# Supplementary material for: Metallo phosphonate catalyzed benzoin couplings: the influence of the counterion
Source: Royal Society of Chemistry journal article supplement (doi:10.1039/c3nj01045g), 2013-12-05
Supplement: c3nj01045g.pdf [file c3nj01045g.pdf]

# Metallo phosphonate catalyzed benzoin couplings: The influence of the counterion

Maria Schumacher,<sup>a</sup> and Bernd Goldfuss\*<sup>a</sup>

5

## Supplementary Information

Table S1. Cartesien coordinates of benzoysilane

Table S2. Cartesien coordinates of benzaldehyde

10 Table S3. Cartesien coordiantes of metal free phosphonate

Table S4. Cartesien coordiantes of lithium phosphonate

Table S6. Cartesien coordiantes of sodium phosphonate

Table S7. Cartesien coordiantes of potassium phosphonate

Table S8. Cartesien coordiantes of free-TS-2

15 Table S9. Cartesien coordiantes of Li-TS-2

Table S10. Cartesien coordiantes of Na-TS-2

Table S11. Cartesien coordiantes of K-TS-2

Table S12. Cartesien coordiantes of free-2

Table S13. Cartesien coordiantes of Li-2

20 Table S14. Cartesien coordiantes of Na-2

Table S15. Cartesien coordiantes of K-2

Table S16. Cartesien coordiantes of free-TS-3

Table S17. Cartesien coordiantes of Li-TS-3

Table S18. Cartesien coordiantes of Na-TS-3

25 Table S19. Cartesien coordiantes of K-TS-3

Table S20. Cartesien coordiantes of free-3

Table S21. Cartesien coordiantes of Li-2

Table S22. Cartesien coordiantes of Na-3

Table S23. Cartesien coordiantes of K-3

30 Table S24. Cartesien coordiantes of free-TS-4

Table S25. Cartesien coordiantes of Li-TS-4

Table S26. Cartesien coordiantes of Na-TS-4

Table S27. Cartesien coordiantes of K-TS-4

Table S28. Cartesien coordiantes of free-4

35 Table S29. Cartesien coordiantes of Li-3

Table S30. Cartesien coordiantes of Na-4

Table S31. Cartesien coordiantes of K-4

Table S32. Cartesien coordiantes of free-TS-5

Table S33. Cartesien coordiantes of Li-TS-5

40 Table S34. Cartesien coordiantes of Na-TS-5

Table S35. Cartesien coordiantes of K-TS-5

**Table S1. Cartesien coordinates of benzoylsilane**

|       |             |             |             |
|-------|-------------|-------------|-------------|
| C     | -4.01058900 | 0.85450100  | 0.76120700  |
| C     | -2.68002200 | 0.67058600  | 1.13358900  |
| 5 C   | -1.64566700 | 0.93128100  | 0.22356800  |
| C     | -1.96428900 | 1.38300100  | -1.06002500 |
| C     | -3.29853500 | 1.56733200  | -1.43054400 |
| C     | -4.32508200 | 1.30268900  | -0.52401800 |
| H     | -4.80249200 | 0.64874600  | 1.47661900  |
| 10 H  | -2.43924300 | 0.32434600  | 2.13548400  |
| H     | -1.16357000 | 1.59518300  | -1.75997500 |
| H     | -3.53354700 | 1.92116000  | -2.43125100 |
| H     | -5.36244200 | 1.44679500  | -0.81411300 |
| C     | -0.19546400 | 0.74450500  | 0.66644500  |
| 15 H  | -0.01931000 | 1.40553900  | 1.52654700  |
| C     | 0.02087400  | -0.67633200 | 1.24886900  |
| C     | 0.17272800  | -1.87111900 | 0.36304000  |
| C     | 0.03502800  | -1.82523400 | -1.03403200 |
| C     | 0.44229600  | -3.10263100 | 0.98472600  |
| 20 C  | 0.16100100  | -2.99177000 | -1.78783800 |
| H     | -0.16659800 | -0.88344800 | -1.52775700 |
| C     | 0.57402900  | -4.26273800 | 0.22915400  |
| H     | 0.53943200  | -3.12183900 | 2.06523700  |
| C     | 0.43201300  | -4.20930100 | -1.16092000 |
| 25 H  | 0.04783900  | -2.94895200 | -2.86769300 |
| H     | 0.78374400  | -5.20938900 | 0.71981700  |
| H     | 0.53177800  | -5.11536000 | -1.75309400 |
| O     | 0.03911200  | -0.78885300 | 2.46771400  |
| O     | 0.70437700  | 1.03987900  | -0.38689300 |
| 30 Si | 2.24286900  | 1.70832200  | -0.15865600 |
| C     | 3.31521700  | 0.54836400  | 0.87133300  |
| H     | 3.43119400  | -0.42503500 | 0.38084600  |
| H     | 4.31724500  | 0.97110100  | 1.01733000  |
| H     | 2.88530700  | 0.36950300  | 1.86397700  |
| 35 C  | 2.08373100  | 3.38193600  | 0.69988700  |
| H     | 3.06962400  | 3.84661300  | 0.82657500  |
| H     | 1.46281900  | 4.07071400  | 0.11539600  |
| H     | 1.63662200  | 3.29469900  | 1.69727700  |
| C     | 2.92193300  | 1.89944600  | -1.90055700 |
| 40 H  | 2.28759400  | 2.55806200  | -2.50470500 |
| H     | 3.93094500  | 2.32911900  | -1.88560900 |
| H     | 2.97977100  | 0.93063200  | -2.40959400 |

**45 Table S2. Cartesien coordinates of benzaldehyde**

|      |             |             |             |
|------|-------------|-------------|-------------|
| C    | 1.73604900  | 1.06060300  | -0.00000900 |
| C    | 0.36121100  | 1.29213000  | 0.00002500  |
| C    | -0.53386900 | 0.21449000  | 0.00000900  |
| 50 C | -0.04508100 | -1.10119100 | 0.00002000  |
| C    | 1.32634800  | -1.33130600 | 0.00001000  |
| C    | 2.21688900  | -0.25078300 | -0.00002400 |
| H    | 2.43035000  | 1.89611300  | -0.00001700 |
| H    | -0.02497900 | 2.30946000  | -0.00000300 |
| 55 H | -0.75923500 | -1.91901600 | 0.00000900  |
| H    | 1.70800500  | -2.34855000 | 0.00002100  |
| H    | 3.28822500  | -0.43337200 | -0.00004300 |
| C    | -1.99222000 | 0.46858200  | 0.00000200  |
| O    | -2.84809500 | -0.39574200 | -0.00002300 |
| 60 H | -2.27356200 | 1.54615500  | 0.00002000  |

**Table S3. Cartesien coordiantes of metal free phosphonate**

|      |             |             |             |
|------|-------------|-------------|-------------|
| P    | -0.99269600 | -0.09891500 | -0.45059100 |
| 65 O | -1.73723400 | 0.06895600  | 0.86320100  |
| O    | 0.32011400  | -1.26708100 | -0.13802200 |
| O    | 0.24123800  | 1.16751600  | -0.52825900 |
| C    | 1.54857600  | -0.65315900 | 0.15694300  |
| C    | 1.26969700  | 0.84221000  | 0.37999400  |
| 70 H | 2.02111500  | -1.11091700 | 1.04534000  |
| H    | 2.25708200  | -0.77610700 | -0.68722500 |

|   |            |            |            |
|---|------------|------------|------------|
| H | 2.15763800 | 1.46364200 | 0.18129600 |
| H | 0.95202200 | 1.01767300 | 1.42246700 |

**Table S4. Cartesien coordiantes of lithium phosphonate**

|    |    |             |             |             |
|----|----|-------------|-------------|-------------|
| 5  | C  | -1.54205500 | 0.75793600  | -0.17168400 |
|    | C  | -1.46468600 | -0.55725400 | 0.60451100  |
|    | H  | -2.05411600 | 1.54887000  | 0.38977000  |
|    | H  | -2.06217500 | 0.61406500  | -1.12740400 |
| 10 | H  | -2.39182500 | -1.13588800 | 0.55135500  |
|    | H  | -1.22432000 | -0.38079100 | 1.66427500  |
|    | P  | 0.87878300  | -0.37474000 | -0.55684200 |
|    | O  | 1.78521200  | 0.01837500  | 0.64791600  |
|    | O  | -0.18754400 | 1.14433000  | -0.41565200 |
| 15 | O  | -0.42941300 | -1.30344800 | -0.03326100 |
|    | Li | 1.08169600  | 1.63223000  | 0.89521100  |

**Table S6. Cartesien coordiantes of sodium phosphonate**

|    |    |             |             |             |
|----|----|-------------|-------------|-------------|
| 20 | C  | -1.29073200 | 1.23140000  | -0.34275000 |
|    | C  | -1.70150800 | 0.27086000  | 0.77280800  |
|    | H  | -1.26864700 | 2.27772300  | -0.01154700 |
|    | H  | -1.98455800 | 1.15226200  | -1.19156300 |
|    | H  | -2.78437900 | 0.24751000  | 0.93419400  |
| 25 | H  | -1.21643600 | 0.54286600  | 1.72460000  |
|    | P  | 0.18126000  | -1.00613000 | -0.54570300 |
|    | O  | 1.39087600  | -1.00213700 | 0.41905900  |
|    | O  | 0.01736800  | 0.82259900  | -0.73844400 |
|    | O  | -1.27774700 | -1.01391600 | 0.33280200  |
| 30 | Na | 1.94950700  | 1.03687700  | 0.36746900  |

**Table S7. Cartesien coordiantes of potassium phosphonate**

|    |   |             |             |             |
|----|---|-------------|-------------|-------------|
|    | C | -1.23624200 | 1.46494900  | -0.38119800 |
| 35 | C | -1.81833300 | 0.72655800  | 0.82351800  |
|    | H | -0.88526500 | 2.47484500  | -0.12470100 |
|    | H | -1.99535400 | 1.55892700  | -1.17247800 |
|    | H | -2.84159100 | 1.03978300  | 1.05908700  |
|    | H | -1.19390500 | 0.88939300  | 1.71878100  |
| 40 | P | -0.49322900 | -1.10125000 | -0.52151900 |
|    | O | 0.71351300  | -1.43919300 | 0.37460200  |
|    | O | -0.14455400 | 0.67055700  | -0.82700900 |
|    | O | -1.82968100 | -0.64231200 | 0.44800500  |
|    | K | 2.24883000  | 0.45759700  | 0.19596800  |

45

**Table S8. Cartesien coordiantes of free-TS-2**

|    |    |             |             |             |
|----|----|-------------|-------------|-------------|
|    | C  | 0.23932700  | 0.39589100  | -0.67704600 |
|    | Si | -0.01428800 | 2.20318500  | -0.04645300 |
| 50 | C  | 1.34479900  | 3.26039600  | -0.87150600 |
|    | H  | 1.20527300  | 4.33044100  | -0.66603900 |
|    | H  | 2.34314600  | 2.97844800  | -0.51486900 |
|    | H  | 1.32813900  | 3.11996600  | -1.95871500 |
|    | C  | -1.69192200 | 2.78888400  | -0.69557400 |
| 55 | H  | -1.72571600 | 2.65911500  | -1.78218600 |
|    | H  | -2.49949900 | 2.18558400  | -0.26908000 |
|    | H  | -1.87086100 | 3.84609800  | -0.45818000 |
|    | C  | 0.07310500  | 2.49423100  | 1.83282700  |
|    | H  | 1.10032700  | 2.41209700  | 2.20901600  |
| 60 | H  | -0.28913600 | 3.50146400  | 2.08168400  |
|    | H  | -0.54191500 | 1.76257600  | 2.36871600  |
|    | P  | -1.29625800 | -0.75266800 | 0.79212900  |
|    | O  | -1.43378400 | -0.75924800 | 2.29598100  |
|    | O  | -2.80087400 | -0.32559200 | 0.08917200  |
| 65 | O  | -1.36176400 | -2.32686400 | 0.11520300  |
|    | C  | -3.09898200 | -1.18964700 | -0.99890800 |
|    | C  | -2.58302500 | -2.56621800 | -0.56745500 |
|    | H  | -4.18404700 | -1.18871800 | -1.17333100 |
|    | H  | -2.57775500 | -0.84813600 | -1.90232400 |
| 70 | H  | -2.39612400 | -3.22784000 | -1.42356300 |

|      |             |             |             |
|------|-------------|-------------|-------------|
| H    | -3.30642900 | -3.05666200 | 0.10449900  |
| O    | -0.21201800 | 0.23554900  | -1.85156200 |
| C    | 1.50110600  | -0.37516700 | -0.29424600 |
| C    | 2.19073200  | -1.03069800 | -1.32325900 |
| 5 C  | 2.05361700  | -0.39526200 | 0.99726900  |
| C    | 3.39864300  | -1.68426100 | -1.07584300 |
| H    | 1.74134300  | -1.00988900 | -2.31132800 |
| C    | 3.26166500  | -1.04481000 | 1.24526700  |
| H    | 1.50949500  | 0.06220300  | 1.81862300  |
| 10 C | 3.94482600  | -1.69080900 | 0.20901300  |
| H    | 3.91785100  | -2.18977700 | -1.88911700 |
| H    | 3.66650100  | -1.05920300 | 2.25560800  |
| H    | 4.88748600  | -2.19827500 | 0.40538700  |

15 **Table S9. Cartesien coordiantes of Li-TS-2**

|      |             |             |             |
|------|-------------|-------------|-------------|
| C    | 2.46945500  | -2.41057900 | -0.93844200 |
| C    | 3.48644400  | -1.27789800 | -0.76969000 |
| H    | 2.91293800  | -3.39877100 | -0.78477800 |
| 20 H | 1.99902100  | -2.37922400 | -1.93004100 |
| H    | 4.00928600  | -1.03132600 | -1.69731900 |
| H    | 4.21996200  | -1.51210900 | 0.01155200  |
| P    | 1.43357400  | -0.61666200 | 0.60517900  |
| O    | 1.84014600  | -0.59446600 | 2.08845300  |
| 25 O | 1.47072100  | -2.19866800 | 0.06782400  |
| O    | 2.70692500  | -0.13543500 | -0.37351700 |
| Li   | 0.65696400  | 0.37684000  | 3.03242600  |
| C    | -0.55458600 | 0.65573900  | 0.65853100  |
| Si   | -0.15994100 | 2.15537000  | -0.51198500 |
| 30 C | 0.25320800  | 1.69351100  | -2.30185000 |
| H    | 0.52042000  | 2.60115800  | -2.85833400 |
| H    | 1.11118200  | 1.01424400  | -2.34931200 |
| H    | -0.59175500 | 1.22767100  | -2.82006200 |
| C    | 1.29163100  | 3.09507600  | 0.24972300  |
| 35 H | 2.21434800  | 2.50458800  | 0.22142400  |
| H    | 1.47597200  | 4.02769900  | -0.29775600 |
| H    | 1.07922500  | 3.35493000  | 1.29255000  |
| C    | -1.71968100 | 3.23036800  | -0.47365400 |
| H    | -1.96702800 | 3.51903300  | 0.55390500  |
| 40 H | -1.57611400 | 4.14811900  | -1.05742300 |
| H    | -2.58432400 | 2.70116800  | -0.89039300 |
| O    | -0.57075200 | 1.00858900  | 1.90841300  |
| C    | -1.58390500 | -0.37516700 | 0.23503800  |
| C    | -2.66384700 | -0.62494500 | 1.09406500  |
| 45 C | -1.55091800 | -1.02739400 | -1.00810600 |
| C    | -3.68239500 | -1.50363400 | 0.72250300  |
| H    | -2.69454300 | -0.10924100 | 2.04794200  |
| C    | -2.56713100 | -1.90444300 | -1.37892500 |
| H    | -0.71181800 | -0.86752700 | -1.67834100 |
| 50 C | -3.63906800 | -2.14630000 | -0.51486300 |
| H    | -4.51355000 | -1.68264000 | 1.40020500  |
| H    | -2.51906000 | -2.40815000 | -2.34099400 |
| H    | -4.43104800 | -2.83155500 | -0.80536000 |

55 **Table S10. Cartesien coordiantes of Na-TS-2**

|      |             |             |             |
|------|-------------|-------------|-------------|
| C    | 1.79832500  | -2.81654300 | -0.97786900 |
| C    | 2.96307100  | -1.84241700 | -1.18001600 |
| H    | 2.13655800  | -3.83895900 | -0.78366600 |
| 60 H | 1.12823300  | -2.82141700 | -1.84813200 |
| H    | 3.29953600  | -1.78859400 | -2.21881000 |
| H    | 3.81291500  | -2.09812000 | -0.53485300 |
| P    | 1.35371100  | -0.71861400 | 0.46395000  |
| O    | 2.05096500  | -0.58020300 | 1.81673500  |
| 65 O | 1.08564000  | -2.34575300 | 0.16995400  |
| O    | 2.44152100  | -0.55620500 | -0.80629200 |
| C    | -0.43255500 | 0.73373800  | 0.47205000  |
| Si   | 0.00613200  | 2.05034000  | -0.89006200 |
| C    | 0.16753800  | 1.41056400  | -2.66812700 |
| 70 H | 0.47033500  | 2.23543600  | -3.32634100 |
| H    | 0.93101700  | 0.62925200  | -2.74428300 |

|    |    |             |             |             |
|----|----|-------------|-------------|-------------|
|    | H  | -0.77861600 | 1.01437000  | -3.05260000 |
|    | C  | 1.63174200  | 2.87230500  | -0.37788800 |
|    | H  | 2.47070000  | 2.16950100  | -0.43425600 |
|    | H  | 1.86065500  | 3.71983500  | -1.03569900 |
| 5  | H  | 1.56450600  | 3.25326000  | 0.64734100  |
|    | C  | -1.40496700 | 3.31318900  | -0.81338400 |
|    | H  | -1.52161200 | 3.69958600  | 0.20483400  |
|    | H  | -1.21162400 | 4.16219300  | -1.48094900 |
|    | H  | -2.35965700 | 2.86445600  | -1.11188400 |
| 10 | Na | 1.03883100  | 0.77904600  | 3.12558900  |
|    | O  | -0.38518500 | 1.28273500  | 1.64947800  |
|    | C  | -1.58727800 | -0.22517600 | 0.21659400  |
|    | C  | -2.62444200 | -0.28051400 | 1.15740700  |
|    | C  | -1.70291600 | -0.99668100 | -0.95091000 |
| 15 | C  | -3.74201400 | -1.08890600 | 0.94383500  |
|    | H  | -2.53859000 | 0.33153500  | 2.04908400  |
|    | C  | -2.81866900 | -1.80217100 | -1.16666800 |
|    | H  | -0.90734600 | -0.97932700 | -1.69060300 |
|    | C  | -3.84465200 | -1.85344900 | -0.21858100 |
| 20 | H  | -4.53754200 | -1.11640400 | 1.68495900  |
|    | H  | -2.88605600 | -2.39722700 | -2.07414900 |
|    | H  | -4.71471100 | -2.48266200 | -0.38753400 |

**Table S11. Cartesien coordiantes of K-TS-2**

|    |    |             |             |             |
|----|----|-------------|-------------|-------------|
| 25 | C  | -1.19109800 | 3.23315800  | 0.31984400  |
|    | C  | -0.22376700 | 3.34702100  | 1.50106400  |
|    | H  | -1.43321400 | 4.20732300  | -0.11703100 |
|    | H  | -2.12185100 | 2.73119200  | 0.61552100  |
| 30 | H  | -0.73220600 | 3.52683700  | 2.45277500  |
|    | H  | 0.51818300  | 4.13833100  | 1.33227400  |
|    | P  | 0.61209400  | 1.40696600  | 0.03090200  |
|    | O  | 1.97439700  | 1.70669900  | -0.58468100 |
|    | O  | -0.51337400 | 2.44718000  | -0.66193600 |
| 35 | O  | 0.43423900  | 2.07245800  | 1.57082800  |
|    | C  | 0.11608800  | -0.85215300 | -0.32352800 |
|    | Si | 0.85603200  | -1.71090900 | 1.24924500  |
|    | C  | 0.23951400  | -1.12441100 | 2.94391900  |
|    | H  | 0.83452100  | -1.59661800 | 3.73669200  |
| 40 | H  | 0.32959500  | -0.03875500 | 3.05456700  |
|    | H  | -0.80737800 | -1.40128900 | 3.11256700  |
|    | C  | 2.73544100  | -1.44461700 | 1.15574600  |
|    | H  | 2.98178800  | -0.38054800 | 1.05790800  |
|    | H  | 3.23196300  | -1.82060100 | 2.05841200  |
| 45 | H  | 3.15712400  | -1.98695100 | 0.29985000  |
|    | C  | 0.48564200  | -3.56074100 | 1.05804900  |
|    | H  | 0.82167500  | -3.92319300 | 0.08015600  |
|    | H  | 0.99287400  | -4.14901700 | 1.83302700  |
|    | H  | -0.58916100 | -3.76144100 | 1.13716600  |
| 50 | K  | 2.83732300  | 0.00124900  | -2.20730500 |
|    | O  | 0.81301400  | -1.15348000 | -1.36794400 |
|    | C  | -1.39123700 | -0.75776800 | -0.49453400 |
|    | C  | -1.95154800 | -1.16367100 | -1.71245200 |
|    | C  | -2.25298900 | -0.34927600 | 0.53656900  |
| 55 | C  | -3.33427900 | -1.15845300 | -1.89949400 |
|    | H  | -1.27869500 | -1.48495800 | -2.50071800 |
|    | C  | -3.63449900 | -0.34494500 | 0.35144900  |
|    | H  | -1.83728400 | -0.01071600 | 1.48155700  |
|    | C  | -4.18253500 | -0.75041300 | -0.86918200 |
| 60 | H  | -3.75158300 | -1.47835600 | -2.85170400 |
|    | H  | -4.28587500 | -0.02298700 | 1.16061200  |
|    | H  | -5.26006400 | -0.74900100 | -1.01264400 |

**Table S12. Cartesien coordiantes of free-2**

|    |    |             |            |             |
|----|----|-------------|------------|-------------|
| 65 | C  | -0.04088600 | 0.16202900 | -0.39836600 |
|    | Si | -0.03332500 | 2.07497200 | -0.06062900 |
|    | C  | 1.21235100  | 2.80426000 | -1.29674100 |
|    | H  | 1.11657100  | 3.89553700 | -1.37454800 |
| 70 | H  | 2.24638100  | 2.57224000 | -1.01544300 |
|    | H  | 1.02190200  | 2.36302400 | -2.28013400 |

|      |             |             |             |
|------|-------------|-------------|-------------|
| C    | -1.75104000 | 2.77482000  | -0.46143800 |
| H    | -2.06617200 | 2.37814800  | -1.43093200 |
| H    | -2.49736500 | 2.47339700  | 0.28109000  |
| H    | -1.73397700 | 3.87218100  | -0.51223000 |
| 5 C  | 0.44504500  | 2.66307000  | 1.69483700  |
| H    | 1.47887300  | 2.38909600  | 1.93732100  |
| H    | 0.35593800  | 3.75473200  | 1.78951600  |
| H    | -0.20460300 | 2.19851600  | 2.44560800  |
| P    | -1.22589100 | -0.73272300 | 0.75706100  |
| 10 O | -1.07575300 | -0.64900700 | 2.24260800  |
| O    | -2.74112500 | -0.27386000 | 0.25869000  |
| O    | -1.35253500 | -2.27846600 | 0.14630600  |
| C    | -3.12618000 | -1.05938300 | -0.87514100 |
| C    | -2.55167300 | -2.46201000 | -0.60382700 |
| 15 H | -4.22147000 | -1.06594300 | -0.93699500 |
| H    | -2.66812200 | -0.62224600 | -1.76559300 |
| H    | -2.31358300 | -2.98950600 | -1.53439800 |
| H    | -3.24944300 | -3.07384100 | -0.01297200 |
| O    | -0.50158000 | 0.06227800  | -1.66147200 |
| 20 C | 1.36224200  | -0.43858600 | -0.16494600 |
| C    | 2.04846800  | -0.88470800 | -1.30269700 |
| C    | 2.00508600  | -0.52995100 | 1.08266300  |
| C    | 3.34312600  | -1.39677200 | -1.20496100 |
| H    | 1.51112600  | -0.81100400 | -2.24351200 |
| 25 C | 3.29860300  | -1.04416900 | 1.17928200  |
| H    | 1.47395600  | -0.22481500 | 1.98004400  |
| C    | 3.97924500  | -1.47682300 | 0.03604000  |
| H    | 3.86001900  | -1.73821300 | -2.10163800 |
| H    | 3.77685000  | -1.11350200 | 2.15536900  |
| 30 H | 4.98964700  | -1.87479400 | 0.11505200  |

**Table S13. Cartesien coordiantes of Li-2**

|      |             |             |             |
|------|-------------|-------------|-------------|
| C    | -0.37335800 | -3.22771200 | -0.33217800 |
| 35 C | 0.82593100  | -3.03783800 | -1.27016700 |
| H    | -0.50058100 | -4.26713200 | -0.01958500 |
| H    | -1.30181000 | -2.85830300 | -0.77964100 |
| H    | 0.56527200  | -3.14294000 | -2.32543100 |
| H    | 1.64662800  | -3.72066400 | -1.02398500 |
| 40 P | 0.97312200  | -1.22426700 | 0.49881800  |
| O    | 2.16795900  | -1.29535100 | 1.43011100  |
| O    | -0.07485500 | -2.44332100 | 0.83564000  |
| O    | 1.26315200  | -1.67769600 | -1.05437100 |
| Li   | 1.90828700  | 0.12189600  | 2.59629700  |
| 45 C | 0.22654200  | 0.49871400  | 0.60774800  |
| Si   | 1.13843400  | 1.80231100  | -0.53652900 |
| C    | 1.07800200  | 1.48155600  | -2.40709300 |
| H    | 1.66928500  | 2.24414000  | -2.93066900 |
| H    | 1.49216300  | 0.50099700  | -2.66479300 |
| 50 H | 0.05630700  | 1.53462900  | -2.79856700 |
| C    | 2.96224000  | 1.85882000  | -0.01168600 |
| H    | 3.45325600  | 0.88182500  | -0.09154800 |
| H    | 3.51779700  | 2.56027700  | -0.64650500 |
| H    | 3.05810000  | 2.21040400  | 1.02256400  |
| 55 C | 0.31117900  | 3.45667500  | -0.15441400 |
| H    | 0.27846000  | 3.62084300  | 0.92689400  |
| H    | 0.86406800  | 4.28412800  | -0.61615200 |
| H    | -0.71678200 | 3.48636300  | -0.53225700 |
| O    | 0.51547300  | 0.93035200  | 1.88830700  |
| 60 C | -1.27057600 | 0.41044200  | 0.29422300  |
| C    | -2.18458400 | 0.79940800  | 1.28081500  |
| C    | -1.76586200 | -0.01603300 | -0.94995000 |
| C    | -3.55769300 | 0.75886700  | 1.03414500  |
| H    | -1.78814200 | 1.13288400  | 2.23313500  |
| 65 C | -3.13943300 | -0.05865000 | -1.19418900 |
| H    | -1.07574100 | -0.31250900 | -1.73572300 |
| C    | -4.04297500 | 0.32919600  | -0.20207500 |
| H    | -4.25255700 | 1.06575800  | 1.81247400  |
| H    | -3.50332800 | -0.38844400 | -2.16459000 |
| 70 H | -5.11245500 | 0.30115100  | -0.39396100 |

**Table S14. Cartesien coordiantes of Na-2**

|      |             |             |             |
|------|-------------|-------------|-------------|
| C    | -1.28583100 | -3.01909800 | -0.15784100 |
| C    | -0.43135700 | -3.05730200 | -1.43186200 |
| H    | -1.54793500 | -4.01810300 | 0.20060600  |
| 5 H  | -2.19450600 | -2.42545900 | -0.30098100 |
| H    | -1.02980300 | -3.05266700 | -2.34583600 |
| H    | 0.24446200  | -3.92027300 | -1.44073100 |
| P    | 0.66470800  | -1.40298300 | 0.15425800  |
| O    | 2.04544400  | -1.77252900 | 0.64321400  |
| 10 O | -0.46465300 | -2.38742500 | 0.83801200  |
| O    | 0.34969800  | -1.84495100 | -1.40329100 |
| C    | 0.29623000  | 0.41580800  | 0.44393600  |
| Si   | 1.25135600  | 1.59160700  | -0.78994200 |
| C    | 0.94325900  | 1.33523900  | -2.64851900 |
| 15 H | 1.59380800  | 1.99824600  | -3.23383900 |
| H    | 1.14575700  | 0.30419600  | -2.95862800 |
| H    | -0.09214600 | 1.57015300  | -2.91889500 |
| C    | 3.12007700  | 1.36143600  | -0.49074700 |
| H    | 3.42219200  | 0.30995800  | -0.57333100 |
| 20 H | 3.69846600  | 1.92673800  | -1.23177900 |
| H    | 3.40914000  | 1.74598300  | 0.49658000  |
| C    | 0.76054600  | 3.34972800  | -0.30222600 |
| H    | 0.82342800  | 3.46263100  | 0.78459700  |
| H    | 1.42354400  | 4.08842400  | -0.76943500 |
| 25 H | -0.26674400 | 3.57786400  | -0.60686100 |
| Na   | 2.63705200  | -0.28158600 | 2.14284500  |
| O    | 0.83701500  | 0.72194000  | 1.67038700  |
| C    | -1.22376600 | 0.62681700  | 0.35717900  |
| C    | -1.88479400 | 1.10622800  | 1.49510700  |
| 30 C | -1.97617700 | 0.39977100  | -0.80858000 |
| C    | -3.25884900 | 1.34810800  | 1.47345900  |
| H    | -1.28650800 | 1.28370700  | 2.38174300  |
| C    | -3.35139000 | 0.64111100  | -0.82848500 |
| H    | -1.48720500 | 0.03202400  | -1.70631700 |
| 35 C | -4.00033800 | 1.11660800  | 0.31340400  |
| H    | -3.75368900 | 1.72131800  | 2.36742900  |
| H    | -3.91505100 | 0.46268000  | -1.74155100 |
| H    | -5.07008000 | 1.30928000  | 0.29569300  |

40 **Table S15. Cartesien coordiantes of K-2**

|      |             |             |             |
|------|-------------|-------------|-------------|
| C    | 1.30324100  | -3.06653700 | 0.09589700  |
| C    | 0.74797900  | -3.03014600 | 1.52586800  |
| H    | 1.43186300  | -4.08690900 | -0.27614300 |
| 45 H | 2.25120300  | -2.52357600 | 0.02021900  |
| H    | 1.53267200  | -3.04562800 | 2.28627600  |
| H    | 0.04751300  | -3.85407900 | 1.70764100  |
| P    | -0.58927900 | -1.35053700 | 0.16432100  |
| O    | -2.05495400 | -1.65735300 | 0.00486700  |
| 50 O | 0.31837300  | -2.41211600 | -0.71809100 |
| O    | 0.04516100  | -1.77752900 | 1.63157700  |
| C    | -0.18067400 | 0.42565600  | -0.27805000 |
| Si   | -0.82249400 | 1.70560500  | 1.04730700  |
| C    | -0.18752300 | 1.50305200  | 2.82863200  |
| 55 H | -0.66989800 | 2.23448500  | 3.49034200  |
| H    | -0.39836000 | 0.50203800  | 3.22173200  |
| H    | 0.89390800  | 1.66620000  | 2.89112700  |
| C    | -2.72339900 | 1.59252000  | 1.11387500  |
| H    | -3.06112900 | 0.56087800  | 1.26779100  |
| 60 H | -3.11488700 | 2.19798400  | 1.94065300  |
| H    | -3.16769400 | 1.98445400  | 0.19004500  |
| C    | -0.33723600 | 3.40883400  | 0.38436000  |
| H    | -0.56683600 | 3.46175000  | -0.68476100 |
| H    | -0.88607700 | 4.20711000  | 0.89953100  |
| 65 H | 0.73400000  | 3.60119200  | 0.50900200  |
| K    | -3.13134100 | -0.22688100 | -1.82795000 |
| O    | -0.92478900 | 0.70068800  | -1.39390200 |
| C    | 1.33946100  | 0.55027900  | -0.47781800 |
| C    | 1.79764200  | 0.96322200  | -1.73535900 |
| 70 C | 2.28692500  | 0.31431400  | 0.53378200  |
| C    | 3.16074100  | 1.13325000  | -1.98015100 |
| H    | 1.04997300  | 1.14713300  | -2.49906000 |

|   |   |            |             |             |
|---|---|------------|-------------|-------------|
|   | C | 3.65102600 | 0.48319500  | 0.28771600  |
|   | H | 1.95860300 | -0.00544000 | 1.51856300  |
|   | C | 4.09573500 | 0.89378900  | -0.97137100 |
|   | H | 3.49555700 | 1.45634500  | -2.96370200 |
| 5 | H | 4.36762600 | 0.29829900  | 1.08509600  |
|   | H | 5.15769600 | 1.03001000  | -1.16031500 |

**Table S16. Cartesien coordiantes of free-TS-3**

|    |    |             |             |             |
|----|----|-------------|-------------|-------------|
| 10 | C  | -0.00850000 | 0.18000600  | -0.17001500 |
|    | Si | -0.27513700 | 2.04569200  | -0.02555500 |
|    | C  | 0.95835600  | 2.95921200  | -1.14979400 |
|    | H  | 1.07350500  | 4.00643600  | -0.83650000 |
|    | H  | 1.94722600  | 2.48785700  | -1.10352100 |
| 15 | H  | 0.62924800  | 2.93495800  | -2.19286700 |
|    | C  | -2.05893000 | 2.63626800  | -0.31237700 |
|    | H  | -2.29690900 | 2.64316100  | -1.38059200 |
|    | H  | -2.76723800 | 1.96573500  | 0.18413100  |
|    | H  | -2.20675500 | 3.64818600  | 0.09075500  |
| 20 | C  | 0.14089500  | 2.71946000  | 1.74431400  |
|    | H  | 1.17110600  | 2.46700900  | 2.03075500  |
|    | H  | 0.03865700  | 3.81315500  | 1.81246400  |
|    | H  | -0.52038800 | 2.27592600  | 2.50098700  |
|    | P  | -1.10766800 | -0.98062300 | 0.73710800  |
| 25 | O  | -0.89863800 | -1.22168700 | 2.19350500  |
|    | O  | -2.66175400 | -0.52794500 | 0.38296400  |
|    | O  | -1.15593200 | -2.35707200 | -0.20487800 |
|    | C  | -3.04673600 | -1.09251600 | -0.87724600 |
|    | C  | -2.39603300 | -2.48441500 | -0.89759200 |
| 30 | H  | -4.14112100 | -1.13975000 | -0.91456800 |
|    | H  | -2.64061700 | -0.46607600 | -1.67608200 |
|    | H  | -2.20023300 | -2.83044000 | -1.91878000 |
|    | H  | -3.02260100 | -3.22670200 | -0.38135800 |
|    | O  | -0.50487700 | 0.43078700  | -1.45387300 |
| 35 | C  | 1.41887800  | -0.33470600 | -0.09866000 |
|    | C  | 2.09941800  | -0.55164500 | -1.30687600 |
|    | C  | 2.10637600  | -0.56715500 | 1.10761300  |
|    | C  | 3.42450500  | -0.98877100 | -1.31387600 |
|    | H  | 1.54243900  | -0.36335200 | -2.21950600 |
| 40 | C  | 3.43122100  | -1.00088200 | 1.09645000  |
|    | H  | 1.58563700  | -0.42594400 | 2.05039900  |
|    | C  | 4.10196400  | -1.21363600 | -0.11311100 |
|    | H  | 3.93331200  | -1.15517200 | -2.26297400 |
|    | H  | 3.94502400  | -1.17674200 | 2.04042100  |
| 45 | H  | 5.13777600  | -1.54857800 | -0.11672700 |

**Table S17. Cartesien coordiantes of Li-TS-3**

|    |    |             |             |             |
|----|----|-------------|-------------|-------------|
|    | C  | 2.31505900  | -2.61633900 | -0.14350700 |
| 50 | C  | 1.41836400  | -3.11944600 | 0.99603000  |
|    | H  | 2.85964400  | -3.42434100 | -0.63868400 |
|    | H  | 3.01930800  | -1.85180200 | 0.20117700  |
|    | H  | 1.92188400  | -3.13165000 | 1.96484700  |
|    | H  | 1.00894000  | -4.11319900 | 0.78249100  |
| 55 | P  | 0.00361300  | -1.55331300 | -0.40664500 |
|    | O  | -1.17082100 | -2.18846000 | -1.13293800 |
|    | O  | 1.41860500  | -2.02380500 | -1.09839300 |
|    | O  | 0.33750400  | -2.16728200 | 1.07233200  |
|    | Li | -2.17343700 | -0.86255600 | -1.89946400 |
| 60 | C  | -0.26403800 | 0.19716700  | -0.25108900 |
|    | Si | -2.13523500 | 0.82096700  | 0.34125700  |
|    | C  | -2.25995500 | 0.06681500  | 2.09800000  |
|    | H  | -3.19728200 | 0.36188500  | 2.59142800  |
|    | H  | -2.22653000 | -1.02952000 | 2.07708500  |
| 65 | H  | -1.42428800 | 0.40347200  | 2.72299400  |
|    | C  | -3.82522900 | 0.21534200  | -0.40476200 |
|    | H  | -3.90304400 | -0.88503100 | -0.45761000 |
|    | H  | -4.65953500 | 0.51868100  | 0.23904600  |
|    | H  | -4.03039800 | 0.63845400  | -1.40157700 |
| 70 | C  | -2.12931500 | 2.69774600  | 0.54277100  |
|    | H  | -2.39004900 | 3.20078400  | -0.39481600 |



|      |             |            |             |
|------|-------------|------------|-------------|
| H    | -2.84634100 | 3.00586000 | 1.31345500  |
| H    | -1.13969500 | 3.05727900 | 0.84551600  |
| O    | -1.26592200 | 0.61279000 | -1.24852900 |
| C    | 0.93770300  | 1.06249800 | -0.13931500 |
| 5 C  | 1.17149200  | 2.10187400 | -1.05625600 |
| C    | 1.86255300  | 0.88029600 | 0.90858100  |
| C    | 2.30003900  | 2.91350900 | -0.94041900 |
| H    | 0.45478000  | 2.26373800 | -1.85423600 |
| C    | 2.99188200  | 1.69006100 | 1.01451400  |
| 10 H | 1.67540500  | 0.11335400 | 1.65594900  |
| C    | 3.22080800  | 2.71190800 | 0.08934600  |
| H    | 2.46044300  | 3.71019200 | -1.66324900 |
| H    | 3.68805600  | 1.53273000 | 1.83524300  |
| H    | 4.09701700  | 3.34840000 | 0.17827800  |

15

**Table S18. Cartesien coordiantes of Na-TS-3**

|      |             |             |             |
|------|-------------|-------------|-------------|
| C    | -2.10620400 | 2.76416100  | -0.10830800 |
| C    | -1.31143000 | 3.09785700  | 1.16213700  |
| 20 H | -2.53278500 | 3.65252400  | -0.58189300 |
| H    | -2.89783800 | 2.03426700  | 0.09105700  |
| H    | -1.92226800 | 3.07301000  | 2.06720100  |
| H    | -0.81203000 | 4.07048800  | 1.08453900  |
| P    | 0.14122600  | 1.54365400  | -0.21612700 |
| 25 O | 1.42289900  | 2.13996300  | -0.74811900 |
| O    | -1.15342700 | 2.18230500  | -1.01247400 |
| O    | -0.31762000 | 2.05997600  | 1.27028300  |
| C    | 0.19060300  | -0.24647700 | -0.17469200 |
| Si   | 1.78845400  | -1.15966200 | 0.58391100  |
| 30 C | 1.79076900  | -0.64015900 | 2.43905300  |
| H    | 2.59404800  | -1.13791400 | 3.00141900  |
| H    | 1.92195300  | 0.44279500  | 2.56357700  |
| H    | 0.83699500  | -0.90272900 | 2.91437300  |
| C    | 3.63263900  | -0.73737900 | 0.14947900  |
| 35 H | 3.84211500  | 0.34301300  | 0.21379200  |
| H    | 4.30541900  | -1.20393500 | 0.87917100  |
| H    | 3.94061800  | -1.11477300 | -0.84001100 |
| C    | 1.52681600  | -3.03390800 | 0.59505600  |
| H    | 1.81406800  | -3.48762500 | -0.35984500 |
| 40 H | 2.11391100  | -3.50218700 | 1.39469900  |
| H    | 0.47332800  | -3.27867100 | 0.77115900  |
| Na   | 2.58140800  | 0.71036300  | -1.90110700 |
| O    | 1.17110500  | -0.76581600 | -1.12741600 |
| C    | -1.14343800 | -0.91958800 | -0.19427000 |
| 45 C | -1.47461500 | -1.81429400 | -1.22569000 |
| C    | -2.08755000 | -0.70717500 | 0.82935400  |
| C    | -2.71394600 | -2.45390000 | -1.24545700 |
| H    | -0.73935600 | -2.00448900 | -2.00017700 |
| C    | -3.32667800 | -1.34643100 | 0.80300400  |
| 50 H | -1.83414500 | -0.05477000 | 1.66057600  |
| C    | -3.65068900 | -2.22184800 | -0.23645800 |
| H    | -2.94808100 | -3.14106400 | -2.05550100 |
| H    | -4.03618400 | -1.17198900 | 1.60883200  |
| H    | -4.61331500 | -2.72606500 | -0.25107700 |

55

**Table S19. Cartesien coordiantes of K-TS-3**

|      |             |             |             |
|------|-------------|-------------|-------------|
| C    | -1.91359400 | 2.95265600  | -0.10181300 |
| C    | -1.26838600 | 3.14055200  | 1.27833900  |
| 60 H | -2.17725600 | 3.90349700  | -0.57371700 |
| H    | -2.79854700 | 2.30963900  | -0.04744300 |
| H    | -1.99683800 | 3.15257400  | 2.09233500  |
| H    | -0.66043900 | 4.05216800  | 1.32020800  |
| P    | 0.19343900  | 1.49634200  | 0.01808600  |
| 65 O | 1.58396600  | 1.97885200  | -0.30009600 |
| O    | -0.91578800 | 2.30613600  | -0.90538200 |
| O    | -0.42000700 | 1.99219600  | 1.45871400  |
| C    | 0.03797600  | -0.28708200 | -0.04754400 |
| Si   | 1.38039600  | -1.41681400 | 0.87991600  |
| 70 C | 1.06377300  | -1.05922600 | 2.74963500  |
| H    | 1.68994600  | -1.68593400 | 3.40141500  |

|      |             |             |             |
|------|-------------|-------------|-------------|
| H    | 1.26674900  | -0.01004000 | 3.00208700  |
| H    | 0.01483800  | -1.25393300 | 3.00806800  |
| C    | 3.28608400  | -1.10804400 | 0.82114000  |
| H    | 3.51954200  | -0.03619500 | 0.90290200  |
| 5 H  | 3.77736000  | -1.59250600 | 1.67357800  |
| H    | 3.75490200  | -1.51613100 | -0.08844600 |
| C    | 0.99119700  | -3.26176200 | 0.67955000  |
| H    | 1.44898000  | -3.67053600 | -0.22867700 |
| H    | 1.35451100  | -3.83526200 | 1.54142200  |
| 10 H | -0.08947900 | -3.42840500 | 0.60366300  |
| K    | 2.94470300  | 0.52002500  | -1.85722100 |
| O    | 1.07911700  | -0.88181600 | -0.87580000 |
| C    | -1.34653900 | -0.79637800 | -0.28229000 |
| C    | -1.62496100 | -1.60969200 | -1.39429900 |
| 15 C | -2.39989000 | -0.51359100 | 0.61005800  |
| C    | -2.91199900 | -2.09672500 | -1.62110300 |
| H    | -0.81008200 | -1.85920000 | -2.06557200 |
| C    | -3.68585600 | -0.99988000 | 0.37714900  |
| H    | -2.19791500 | 0.07118900  | 1.50324600  |
| 20 C | -3.95360400 | -1.79119000 | -0.74277600 |
| H    | -3.10169100 | -2.72264300 | -2.49055300 |
| H    | -4.47996800 | -0.77283300 | 1.08516400  |
| H    | -4.95459800 | -2.17643400 | -0.91835600 |

25 **Table S20. Cartesien coordiantes of free-3**

|      |             |             |             |
|------|-------------|-------------|-------------|
| C    | 0.27669300  | -0.29793700 | -0.13569100 |
| Si   | -0.56155600 | 2.27662800  | 0.12686300  |
| C    | 0.53924700  | 3.68783400  | -0.51026900 |
| 30 H | 0.26813800  | 4.64802000  | -0.05041200 |
| H    | 1.59472400  | 3.49225200  | -0.29112800 |
| H    | 0.44235800  | 3.80036500  | -1.59756200 |
| C    | -2.35608700 | 2.78939300  | -0.21449600 |
| H    | -2.55743600 | 2.81650500  | -1.29273600 |
| 35 H | -3.05108400 | 2.07478900  | 0.23932200  |
| H    | -2.57815900 | 3.78533100  | 0.19209900  |
| C    | -0.30306000 | 2.05699800  | 1.98245700  |
| H    | 0.72939100  | 1.76435300  | 2.20129400  |
| H    | -0.52318300 | 2.98793000  | 2.52290200  |
| 40 H | -0.95712100 | 1.26597900  | 2.36243700  |
| P    | -0.90579700 | -1.49641000 | 0.16492400  |
| O    | -0.52738600 | -2.71530200 | 0.94850200  |
| O    | -2.26423900 | -0.71427100 | 0.79622600  |
| O    | -1.73355700 | -1.91762100 | -1.25156400 |
| 45 C | -3.43440500 | -0.91546200 | 0.01599200  |
| C    | -3.11245900 | -2.05896500 | -0.96134900 |
| H    | -4.27879600 | -1.15637500 | 0.67503900  |
| H    | -3.66788400 | 0.00755700  | -0.53269000 |
| H    | -3.68711000 | -1.98460000 | -1.89254500 |
| 50 H | -3.31339300 | -3.03741800 | -0.49833700 |
| O    | -0.22882600 | 0.89773000  | -0.75028800 |
| C    | 1.70043900  | -0.48683100 | -0.13642000 |
| C    | 2.55989500  | 0.47530100  | -0.74286100 |
| C    | 2.35382000  | -1.60219200 | 0.47368600  |
| 55 C | 3.94636100  | 0.34046600  | -0.72571900 |
| H    | 2.11230400  | 1.31663400  | -1.26000200 |
| C    | 3.73581500  | -1.72012100 | 0.47631000  |
| H    | 1.74295500  | -2.36631800 | 0.94218100  |
| C    | 4.56393100  | -0.75318600 | -0.11518700 |
| 60 H | 4.55370300  | 1.10624400  | -1.21019100 |
| H    | 4.18304200  | -2.59000600 | 0.95850700  |
| H    | 5.64721500  | -0.85394900 | -0.09984500 |

**Table S21. Cartesien coordiantes of Li-3**

|      |            |             |             |
|------|------------|-------------|-------------|
| 65 C | 3.82182000 | -0.53270100 | -0.20074200 |
| C    | 3.44714900 | -1.47169800 | 0.95948100  |
| H    | 4.67454200 | -0.90034600 | -0.77860100 |
| H    | 4.03502100 | 0.48277500  | 0.15275600  |
| 70 H | 3.94269200 | -1.20574800 | 1.89662400  |
| H    | 3.66954900 | -2.51818200 | 0.71592700  |

|    |    |             |             |             |
|----|----|-------------|-------------|-------------|
|    | P  | 1.31085300  | -1.08577600 | -0.34857200 |
|    | O  | 0.90769000  | -2.44163800 | -0.94514300 |
|    | O  | 2.67078500  | -0.48035400 | -1.05347700 |
|    | O  | 2.03423300  | -1.30363200 | 1.13003300  |
| 5  | Li | -0.72935400 | -2.22443100 | -1.61549700 |
|    | C  | 0.00996000  | 0.00335600  | -0.36869200 |
|    | Si | -2.51011900 | -0.90760400 | 0.30105800  |
|    | C  | -1.89336600 | -0.86074700 | 2.07022300  |
|    | H  | -2.69246500 | -1.14953500 | 2.76456100  |
| 10 | H  | -1.04439800 | -1.53637900 | 2.21864100  |
|    | H  | -1.55716000 | 0.14703000  | 2.33479600  |
|    | C  | -3.04610800 | -2.66255200 | -0.20450200 |
|    | H  | -2.27197700 | -3.41311400 | 0.01381600  |
|    | H  | -3.94185400 | -2.97893800 | 0.34333200  |
| 15 | H  | -3.30999300 | -2.72219400 | -1.27186000 |
|    | C  | -3.93178700 | 0.28633700  | 0.00264100  |
|    | H  | -4.25089700 | 0.27432900  | -1.04635300 |
|    | H  | -4.79983100 | 0.01971500  | 0.61877200  |
|    | H  | -3.64111500 | 1.31204000  | 0.25152800  |
| 20 | O  | -1.24067900 | -0.61197700 | -0.80951100 |
|    | C  | 0.04165300  | 1.43906600  | -0.21494800 |
|    | C  | -0.94112400 | 2.27368400  | -0.80060900 |
|    | C  | 1.05778600  | 2.08093200  | 0.53737200  |
|    | C  | -0.89674500 | 3.65879900  | -0.65395400 |
| 25 | H  | -1.72571600 | 1.82260900  | -1.39975200 |
|    | C  | 1.10527700  | 3.46527400  | 0.65791400  |
|    | H  | 1.79504800  | 1.47620900  | 1.05845300  |
|    | C  | 0.12778400  | 4.27344000  | 0.06850300  |
|    | H  | -1.66821600 | 4.26535300  | -1.12439400 |
| 30 | H  | 1.90309300  | 3.91864000  | 1.24274300  |
|    | H  | 0.16058800  | 5.35379700  | 0.17793100  |

**Table S22. Cartesien coordiantes of Na-3**

|    |    |             |             |             |
|----|----|-------------|-------------|-------------|
| 35 | C  | 3.72251800  | -0.69083600 | 0.23041200  |
|    | C  | 3.13403500  | -1.63856600 | 1.29192800  |
|    | H  | 4.60337700  | -1.10938600 | -0.26429800 |
|    | H  | 3.98251200  | 0.28278900  | 0.66265600  |
|    | H  | 3.53360200  | -1.44840400 | 2.29161700  |
| 40 | H  | 3.30395500  | -2.69012200 | 1.02771800  |
|    | P  | 1.22362700  | -1.05812800 | -0.25965400 |
|    | O  | 0.84199400  | -2.37056000 | -0.93360500 |
|    | O  | 2.69355800  | -0.49133700 | -0.74954200 |
|    | O  | 1.73101400  | -1.35827900 | 1.30074600  |
| 45 | C  | 0.03774300  | 0.15410800  | -0.49674800 |
|    | Si | -2.36303500 | -0.79896300 | 0.56054500  |
|    | C  | -1.61791400 | -0.40141200 | 2.23737600  |
|    | H  | -2.33341600 | -0.64542800 | 3.03304400  |
|    | H  | -0.69732400 | -0.96458200 | 2.41997400  |
| 50 | H  | -1.37493400 | 0.66374800  | 2.31324300  |
|    | C  | -2.66500600 | -2.65580700 | 0.36191700  |
|    | H  | -1.71864200 | -3.20691900 | 0.41403600  |
|    | H  | -3.32835200 | -3.04489100 | 1.14421500  |
|    | H  | -3.14117200 | -2.88657400 | -0.60197700 |
| 55 | C  | -3.98167600 | 0.12985200  | 0.28038700  |
|    | H  | -4.36715000 | -0.02994000 | -0.73438800 |
|    | H  | -4.75402200 | -0.20985100 | 0.98197600  |
|    | H  | -3.84969900 | 1.20789800  | 0.42162200  |
|    | Na | -0.58913300 | -1.61678800 | -2.38708500 |
| 60 | O  | -1.30338500 | -0.37474700 | -0.70976000 |
|    | C  | 0.12923700  | 1.58994500  | -0.30160700 |
|    | C  | -0.98327500 | 2.42231800  | -0.58197700 |
|    | C  | 1.30421500  | 2.24354700  | 0.14776700  |
|    | C  | -0.92081400 | 3.80583400  | -0.42415300 |
| 65 | H  | -1.89849400 | 1.96960700  | -0.94732100 |
|    | C  | 1.35739600  | 3.62445600  | 0.29768500  |
|    | H  | 2.18584900  | 1.65907500  | 0.38412800  |
|    | C  | 0.24734100  | 4.42748000  | 0.01713100  |
|    | H  | -1.80099900 | 4.40303800  | -0.65492500 |
| 70 | H  | 2.28127800  | 4.08019900  | 0.64836700  |
|    | H  | 0.29392300  | 5.50567800  | 0.14201100  |

**Table S23. Cartesien coordiantes of K-3**

|      |             |             |             |
|------|-------------|-------------|-------------|
| C    | -3.36009000 | 1.72408400  | 0.27372100  |
| C    | -2.59739700 | 2.46194900  | 1.39027300  |
| 5 H  | -4.04649700 | 2.38201800  | -0.26801900 |
| H    | -3.92248500 | 0.86936200  | 0.66923700  |
| H    | -3.10570400 | 2.40384600  | 2.35651200  |
| H    | -2.43311100 | 3.51611700  | 1.13148200  |
| P    | -0.82557500 | 1.35661000  | -0.03333900 |
| 10 O | -0.04841300 | 2.48635700  | -0.68139500 |
| O    | -2.36739200 | 1.23314600  | -0.63343500 |
| O    | -1.34352300 | 1.78267900  | 1.49391200  |
| C    | -0.05123300 | -0.16104800 | -0.17302300 |
| Si   | 2.45748100  | -0.06890700 | 0.84673700  |
| 15 C | 2.23193500  | 1.47568600  | 1.90101200  |
| H    | 3.02820500  | 1.54061500  | 2.65400400  |
| H    | 2.26148600  | 2.38395500  | 1.28907600  |
| H    | 1.27114500  | 1.47106000  | 2.42637300  |
| C    | 4.14161200  | -0.01954100 | -0.01671000 |
| 20 H | 4.26483400  | 0.89520100  | -0.61178700 |
| H    | 4.95966900  | -0.03975400 | 0.71375000  |
| H    | 4.27575000  | -0.87971200 | -0.68405300 |
| C    | 2.29828600  | -1.61613000 | 1.90670800  |
| H    | 2.50921600  | -2.52699900 | 1.33657500  |
| 25 H | 2.99576300  | -1.57292900 | 2.75317100  |
| H    | 1.28431000  | -1.70926600 | 2.30945000  |
| K    | 0.98066700  | 1.19435200  | -2.63454100 |
| O    | 1.36958400  | -0.08765100 | -0.45823500 |
| C    | -0.64097900 | -1.48469400 | -0.14905600 |
| 30 C | 0.05114000  | -2.59685600 | -0.69441500 |
| C    | -1.92347200 | -1.74978200 | 0.39524400  |
| C    | -0.51331800 | -3.87051400 | -0.71654300 |
| H    | 1.04550800  | -2.44678300 | -1.10385800 |
| C    | -2.48237800 | -3.02218700 | 0.35805500  |
| 35 H | -2.47246500 | -0.94933200 | 0.88022000  |
| C    | -1.78944200 | -4.10156400 | -0.19988300 |
| H    | 0.05610500  | -4.69368400 | -1.14487400 |
| H    | -3.46870400 | -3.17752100 | 0.79123500  |
| H    | -2.22683900 | -5.09598300 | -0.21551800 |

40

**Table S24. Cartesien coordiantes of free-TS-4**

|      |             |             |             |
|------|-------------|-------------|-------------|
| C    | 0.61966900  | 0.36569000  | 0.29102600  |
| Si   | 1.76327300  | -1.99278300 | -1.01072100 |
| 45 C | 2.98162500  | -2.99908700 | 0.06377500  |
| H    | 3.37522500  | -3.86570300 | -0.48625800 |
| H    | 3.83491800  | -2.38533900 | 0.37758400  |
| H    | 2.50188600  | -3.37668700 | 0.97625200  |
| C    | 0.34895900  | -3.19185100 | -1.41683700 |
| 50 H | -0.50592000 | -2.99596200 | -0.76158700 |
| H    | 0.00649800  | -3.04678700 | -2.44427800 |
| H    | 0.66011700  | -4.23703400 | -1.28114600 |
| C    | 2.76341900  | -1.50593700 | -2.54530000 |
| H    | 3.68123500  | -0.97163200 | -2.26864400 |
| 55 H | 3.06348200  | -2.40568400 | -3.10139900 |
| H    | 2.16498500  | -0.86809600 | -3.19834700 |
| P    | -0.45101000 | 0.03432500  | 1.66269000  |
| O    | -1.40467700 | 1.10749600  | 2.06484400  |
| O    | -1.18050100 | -1.42722900 | 1.35364500  |
| 60 O | 0.45177100  | -0.56155300 | 2.94638500  |
| C    | -0.71536300 | -2.46585100 | 2.21128400  |
| C    | -0.12111200 | -1.76527900 | 3.44084700  |
| H    | -1.55938200 | -3.11700900 | 2.46546600  |
| H    | 0.04775800  | -3.05512500 | 1.68806000  |
| 65 H | 0.66323000  | -2.36014300 | 3.92160300  |
| H    | -0.90221900 | -1.53910800 | 4.18192800  |
| O    | 1.44327000  | -0.73963100 | 0.05084900  |
| C    | 1.30940100  | 1.66053800  | 0.22735900  |
| C    | 2.58848300  | 1.75511900  | -0.36984000 |
| 70 C | 0.71609000  | 2.87799500  | 0.65412700  |
| C    | 3.23307800  | 2.98042300  | -0.52774800 |
| H    | 3.07421400  | 0.84632900  | -0.70366200 |

|      |             |             |             |
|------|-------------|-------------|-------------|
| C    | 1.37143900  | 4.09471200  | 0.49498700  |
| H    | -0.25613400 | 2.84738300  | 1.13403600  |
| C    | 2.63674300  | 4.16756600  | -0.09876900 |
| H    | 4.21881400  | 3.00357800  | -0.99120900 |
| 5 H  | 0.88363000  | 5.00384100  | 0.84450100  |
| H    | 3.14092700  | 5.12351100  | -0.22350800 |
| C    | -0.58427800 | 0.47208300  | -1.74353500 |
| O    | -0.07644500 | -0.49378600 | -2.35270800 |
| H    | -0.13561100 | 1.47765100  | -1.81397500 |
| 10 C | -2.03435800 | 0.48971200  | -1.37865200 |
| C    | -2.64927300 | 1.66645400  | -0.92770400 |
| C    | -2.82516200 | -0.65157800 | -1.57984300 |
| C    | -4.01848700 | 1.69997100  | -0.67141000 |
| H    | -2.04096700 | 2.55356800  | -0.77033700 |
| 15 C | -4.19365200 | -0.61936300 | -1.32456500 |
| H    | -2.33989200 | -1.54969700 | -1.94799000 |
| C    | -4.79761200 | 0.55720700  | -0.86989400 |
| H    | -4.47894700 | 2.61774300  | -0.31191400 |
| H    | -4.79619100 | -1.51201400 | -1.48387200 |
| 20 H | -5.86733500 | 0.58299100  | -0.67153900 |

**Table S25. Cartesien coordiantes of Li-TS-4**

No coordinates

25

**Table S26. Cartesien coordiantes of Na-TS-4**

|      |             |             |             |
|------|-------------|-------------|-------------|
| C    | -1.11702500 | 2.47713400  | 2.67986600  |
| C    | -2.40153600 | 1.84049800  | 2.13568800  |
| 30 H | -1.25446100 | 2.92503900  | 3.66801700  |
| H    | -0.72149100 | 3.22913200  | 1.98755000  |
| H    | -3.01461500 | 2.53865300  | 1.56102200  |
| H    | -3.00429000 | 1.39628900  | 2.93612800  |
| P    | -0.50539000 | 0.20464400  | 1.69070700  |
| 35 O | -0.51820400 | -1.13274900 | 2.38582400  |
| O    | -0.18418500 | 1.39556500  | 2.79940900  |
| O    | -1.96230100 | 0.79970700  | 1.24458800  |
| C    | 0.50425700  | 0.21718000  | 0.23104400  |
| Si   | 3.05159100  | -1.09238400 | -0.28695600 |
| 40 C | 2.93650800  | -0.99636500 | -2.16108900 |
| H    | 3.89268700  | -1.30108900 | -2.60589700 |
| H    | 2.15927600  | -1.66884300 | -2.53655500 |
| H    | 2.71706700  | 0.01972300  | -2.50407300 |
| C    | 3.24453700  | -2.90540100 | 0.25967300  |
| 45 H | 2.47699300  | -3.55131800 | -0.18400900 |
| H    | 4.21415500  | -3.29437300 | -0.07442300 |
| H    | 3.24269000  | -3.01384100 | 1.35551700  |
| C    | 4.60064300  | -0.21060000 | 0.34683500  |
| H    | 4.58651100  | -0.13098400 | 1.44039800  |
| 50 H | 5.49197300  | -0.78805500 | 0.06873200  |
| H    | 4.72804700  | 0.79801400  | -0.05873100 |
| O    | 1.70414200  | -0.51030900 | 0.55153600  |
| C    | 0.67586200  | 1.51385400  | -0.45871700 |
| C    | 1.93036000  | 2.14787100  | -0.58202800 |
| 55 C | -0.43225400 | 2.17441700  | -1.04218800 |
| C    | 2.07768100  | 3.35244400  | -1.26879400 |
| H    | 2.79382700  | 1.70919800  | -0.09857300 |
| C    | -0.28241800 | 3.38536400  | -1.71357900 |
| H    | -1.41367000 | 1.72233900  | -0.96756800 |
| 60 C | 0.97411700  | 3.98351800  | -1.84362900 |
| H    | 3.06297600  | 3.80823000  | -1.33780500 |
| H    | -1.15744700 | 3.86004500  | -2.15243100 |
| H    | 1.08849000  | 4.92251400  | -2.37819700 |
| C    | -0.45896600 | -1.49509000 | -1.28234900 |
| 65 O | 0.11829700  | -2.52649300 | -0.84860400 |
| H    | 0.04250900  | -0.87199500 | -2.03765800 |
| C    | -1.93264000 | -1.32493300 | -1.23891400 |
| C    | -2.55114000 | -0.41952700 | -2.11557500 |
| C    | -2.73710000 | -2.12071500 | -0.40844900 |
| 70 C | -3.93846700 | -0.28833700 | -2.13924200 |
| H    | -1.93553100 | 0.17622700  | -2.78495300 |

|     |             |             |             |
|-----|-------------|-------------|-------------|
| C   | -4.12199800 | -1.98643400 | -0.42783100 |
| H   | -2.26559700 | -2.84503500 | 0.24806200  |
| C   | -4.72793300 | -1.06771500 | -1.29047000 |
| H   | -4.40476800 | 0.41414800  | -2.82535600 |
| 5 H | -4.73426500 | -2.60307600 | 0.22529300  |
| H   | -5.81024900 | -0.96914000 | -1.30898200 |
| Na  | 0.66916700  | -2.55698600 | 1.26161500  |

**Table S27. Cartesien coordiantes of K-TS-4**

|    |    |             |             |             |
|----|----|-------------|-------------|-------------|
| 10 | C  | -0.79591500 | -3.22501400 | 2.06440100  |
|    | C  | 0.56120800  | -3.51047500 | 1.40970700  |
|    | H  | -0.96648200 | -3.83193500 | 2.95840600  |
|    | H  | -1.61914200 | -3.37859800 | 1.35657700  |
| 15 | H  | 0.51651600  | -4.31632800 | 0.67268400  |
|    | H  | 1.32936000  | -3.74116400 | 2.15745500  |
|    | P  | 0.25080200  | -0.97914700 | 1.44012900  |
|    | O  | 1.16475300  | -0.11923400 | 2.26662900  |
|    | O  | -0.74230300 | -1.84918500 | 2.45429300  |
| 20 | O  | 0.91769100  | -2.29910700 | 0.72380300  |
|    | C  | -0.56454100 | -0.12938500 | 0.11627100  |
|    | Si | -2.04456400 | 2.33938000  | -0.01285200 |
|    | C  | -2.33371600 | 2.27071200  | -1.86952500 |
|    | H  | -2.97001900 | 3.11341500  | -2.17119100 |
| 25 | H  | -1.38122500 | 2.35092500  | -2.40040600 |
|    | H  | -2.83515600 | 1.34737000  | -2.17535000 |
|    | C  | -1.21423700 | 3.98323000  | 0.45700900  |
|    | H  | -0.29729100 | 4.14884200  | -0.11846900 |
|    | H  | -1.89324500 | 4.81546300  | 0.23294900  |
| 30 | H  | -0.99844800 | 4.04963000  | 1.53379900  |
|    | C  | -3.70211800 | 2.34129100  | 0.90753900  |
|    | H  | -3.55842300 | 2.21151400  | 1.98723500  |
|    | H  | -4.21080300 | 3.30240100  | 0.75555900  |
|    | H  | -4.38280700 | 1.55582500  | 0.56409800  |
| 35 | O  | -1.07239900 | 1.11257900  | 0.62617400  |
|    | C  | -1.54891000 | -0.97080800 | -0.62610300 |
|    | C  | -2.92484800 | -0.96268000 | -0.30936500 |
|    | C  | -1.13710600 | -1.84676600 | -1.65065100 |
|    | C  | -3.83843700 | -1.75908200 | -0.99703500 |
| 40 | H  | -3.26975400 | -0.34491300 | 0.51197300  |
|    | C  | -2.04743800 | -2.65768000 | -2.32861000 |
|    | H  | -0.08784900 | -1.88797600 | -1.91895500 |
|    | C  | -3.40681100 | -2.61372400 | -2.01506500 |
|    | H  | -4.89050300 | -1.72714800 | -0.72254500 |
| 45 | H  | -1.69176900 | -3.31709200 | -3.11703100 |
|    | H  | -4.11777600 | -3.23591200 | -2.55209000 |
|    | C  | 1.11310600  | 0.92806100  | -1.49411800 |
|    | O  | 0.86296500  | 2.12968900  | -1.24609100 |
|    | H  | 0.48350900  | 0.35768300  | -2.18999800 |
| 50 | C  | 2.47815200  | 0.37062600  | -1.24157100 |
|    | C  | 2.78682600  | -0.98709300 | -1.41721000 |
|    | C  | 3.52175700  | 1.25355500  | -0.90557200 |
|    | C  | 4.08414000  | -1.45315200 | -1.22270900 |
|    | H  | 1.99960500  | -1.68542700 | -1.67750000 |
| 55 | C  | 4.82123900  | 0.78742100  | -0.70761300 |
|    | H  | 3.30913700  | 2.31935100  | -0.86622900 |
|    | C  | 5.10572400  | -0.57122000 | -0.85779500 |
|    | H  | 4.30058500  | -2.51031600 | -1.35194100 |
|    | H  | 5.61614000  | 1.48654200  | -0.45869300 |
| 60 | H  | 6.11720600  | -0.93865200 | -0.70674700 |
|    | K  | 1.34559900  | 2.23723900  | 1.35810800  |

**Table S28. Cartesien coordiantes of free-4**

|    |    |            |             |             |
|----|----|------------|-------------|-------------|
| 65 | C  | 0.16487000 | 0.47521200  | -0.01343600 |
|    | Si | 2.22283800 | -0.81954500 | -1.38063900 |
|    | C  | 3.97303700 | -0.03718100 | -0.90374800 |
|    | H  | 4.76875300 | -0.46450000 | -1.53356700 |
|    | H  | 3.99486800 | 1.05339500  | -1.04085700 |
| 70 | H  | 4.26586600 | -0.22532200 | 0.14156900  |
|    | C  | 2.78624600 | -2.65361700 | -1.13954600 |

|      |             |             |             |
|------|-------------|-------------|-------------|
| H    | 2.67755600  | -2.94855100 | -0.08565400 |
| H    | 2.16231000  | -3.34154100 | -1.72109000 |
| H    | 3.83873900  | -2.80610600 | -1.41291600 |
| C    | 2.18566200  | -0.27744100 | -3.22603500 |
| 5 H  | 1.70852600  | 0.70821700  | -3.32286900 |
| H    | 3.19328500  | -0.18659400 | -3.65243600 |
| H    | 1.60725500  | -0.97743200 | -3.84052600 |
| P    | -0.10297200 | -0.03715200 | 1.77210700  |
| O    | -1.49221400 | -0.06650300 | 2.29858900  |
| 10 O | 0.74276600  | -1.42600700 | 2.03020800  |
| O    | 0.94128300  | 0.94142000  | 2.59931500  |
| C    | 2.07582000  | -1.14759700 | 2.47871400  |
| C    | 1.99639100  | 0.20129900  | 3.21464500  |
| H    | 2.38766100  | -1.96281200 | 3.13987100  |
| 15 H | 2.74268400  | -1.09069100 | 1.61653700  |
| H    | 2.92510900  | 0.77219900  | 3.12078300  |
| H    | 1.76225400  | 0.06442700  | 4.27936100  |
| O    | 1.53909200  | 0.40223200  | -0.21706600 |
| C    | -0.35253200 | 1.90862600  | -0.17361400 |
| 20 C | 0.49792100  | 2.88453100  | -0.71036100 |
| C    | -1.66905500 | 2.27304300  | 0.15495000  |
| C    | 0.04253600  | 4.18452500  | -0.93392300 |
| H    | 1.51896700  | 2.60233000  | -0.93999000 |
| C    | -2.12045700 | 3.57513400  | -0.06774400 |
| 25 H | -2.33013100 | 1.54125100  | 0.60592200  |
| C    | -1.27047100 | 4.53704900  | -0.61688500 |
| H    | 0.71980300  | 4.92623900  | -1.35324700 |
| H    | -3.14295800 | 3.83770100  | 0.19615300  |
| H    | -1.62568600 | 5.55117800  | -0.78882400 |
| 30 C | -0.46916400 | -0.50652400 | -1.12241000 |
| O    | 0.49576600  | -1.45092100 | -1.37543900 |
| H    | -0.62675900 | 0.16765500  | -1.98911200 |
| C    | -1.80988000 | -1.15843100 | -0.81566200 |
| C    | -3.01447200 | -0.57733800 | -1.22961900 |
| 35 C | -1.85560400 | -2.39984700 | -0.16726600 |
| C    | -4.23806800 | -1.20157200 | -0.97725700 |
| H    | -2.99152300 | 0.37158600  | -1.76056600 |
| C    | -3.07464900 | -3.02632000 | 0.08489200  |
| H    | -0.91852300 | -2.86514600 | 0.11935400  |
| 40 C | -4.27300300 | -2.42970600 | -0.31587800 |
| H    | -5.16281400 | -0.73192500 | -1.30726300 |
| H    | -3.09070300 | -3.98798300 | 0.59398100  |
| H    | -5.22401300 | -2.92148800 | -0.12104500 |

45 **Table S29. Cartesien coordiantes of Li-4**

|      |             |             |             |
|------|-------------|-------------|-------------|
| C    | -0.81346800 | 2.80833400  | 2.28125500  |
| C    | -1.95082200 | 1.83616500  | 2.62903700  |
| H    | -0.61419000 | 3.52526700  | 3.08077600  |
| 50 H | -1.00297200 | 3.34029400  | 1.34407100  |
| H    | -2.92366700 | 2.17975900  | 2.27178800  |
| H    | -2.00122900 | 1.63514900  | 3.70432000  |
| P    | -0.03222500 | 0.47827000  | 1.66689300  |
| O    | 0.65953700  | -0.57220200 | 2.50068500  |
| 55 O | 0.36261100  | 1.98917000  | 2.12271700  |
| O    | -1.63607700 | 0.60306400  | 1.94462100  |
| Li   | 1.58614600  | -1.89085200 | 1.60429500  |
| C    | 0.32292900  | 0.32301800  | -0.16982300 |
| Si   | 2.94421200  | -0.61591300 | -0.48906200 |
| 60 C | 3.16300100  | -1.37036000 | -2.22140300 |
| H    | 4.22123900  | -1.62092900 | -2.37241100 |
| H    | 2.56626400  | -2.27105600 | -2.38684700 |
| H    | 2.90793300  | -0.63366400 | -2.99419100 |
| C    | 3.73851700  | -1.64628500 | 0.95604500  |
| 65 H | 3.42827600  | -2.70329600 | 1.00963300  |
| H    | 4.82228200  | -1.66411800 | 0.80184400  |
| H    | 3.60865600  | -1.16837800 | 1.94223100  |
| C    | 4.28263900  | 0.77432700  | -0.53945900 |
| H    | 4.33862800  | 1.33009200  | 0.40598700  |
| 70 H | 5.28204600  | 0.36253900  | -0.73742000 |
| H    | 4.07118000  | 1.50760800  | -1.32852400 |
| O    | 1.69874300  | 0.60744700  | -0.21299800 |

|      |             |             |             |
|------|-------------|-------------|-------------|
| C    | -0.47160300 | 1.36948600  | -0.94689700 |
| C    | 0.20643000  | 2.43610300  | -1.55384000 |
| C    | -1.86877100 | 1.29616500  | -1.07691100 |
| C    | -0.49190600 | 3.39671700  | -2.28749300 |
| 5 H  | 1.28203500  | 2.49866100  | -1.44131800 |
| C    | -2.56279100 | 2.25888500  | -1.81115400 |
| H    | -2.41788300 | 0.48901200  | -0.60665600 |
| C    | -1.87832800 | 3.31201600  | -2.42099000 |
| H    | 0.05206400  | 4.21375500  | -2.75459200 |
| 10 H | -3.64270900 | 2.18078700  | -1.90827700 |
| H    | -2.42146400 | 4.05915400  | -2.99386800 |
| C    | 0.19945200  | -1.16078400 | -0.71693600 |
| O    | 1.29565100  | -1.82559400 | -0.17709500 |
| H    | 0.34174100  | -1.02041600 | -1.80370000 |
| 15 C | -1.11642600 | -1.90875500 | -0.54823800 |
| C    | -1.92989200 | -2.11264700 | -1.67207600 |
| C    | -1.53685900 | -2.45326300 | 0.67445000  |
| C    | -3.12850900 | -2.82135500 | -1.58111000 |
| H    | -1.61452800 | -1.71265300 | -2.63255800 |
| 20 C | -2.73412200 | -3.16337100 | 0.77087400  |
| H    | -0.93819900 | -2.32091500 | 1.57032500  |
| C    | -3.53628000 | -3.35001100 | -0.35601900 |
| H    | -3.73734800 | -2.96713300 | -2.46967500 |
| H    | -3.03892900 | -3.57214400 | 1.73085500  |
| 25 H | -4.46612600 | -3.90747100 | -0.28051200 |

**Table S30. Cartesian coordinates of Na-4**

|       |             |             |             |
|-------|-------------|-------------|-------------|
| C     | 1.72433500  | -2.45096800 | 2.30802700  |
| 30 C  | 2.54598000  | -1.18386800 | 2.59122500  |
| H     | 1.76212500  | -3.16822500 | 3.13121600  |
| H     | 2.03359400  | -2.93721800 | 1.37802200  |
| H     | 3.56494900  | -1.24926900 | 2.20383900  |
| H     | 2.57245800  | -0.94621700 | 3.66036300  |
| 35 P  | 0.28682100  | -0.46077200 | 1.67047600  |
| O     | -0.64512200 | 0.37444200  | 2.50511700  |
| O     | 0.35997800  | -2.00912100 | 2.17211700  |
| O     | 1.87258400  | -0.11423200 | 1.89603800  |
| C     | -0.11015100 | -0.49617300 | -0.16623500 |
| 40 Si | -2.86226400 | -0.38058000 | -0.64041700 |
| C     | -3.14365700 | -0.02378400 | -2.49265300 |
| H     | -4.21289500 | -0.12319600 | -2.72149700 |
| H     | -2.81901400 | 0.97399200  | -2.80342000 |
| H     | -2.62510900 | -0.76635700 | -3.11280300 |
| 45 C  | -4.13708400 | 0.53295100  | 0.51816000  |
| H     | -4.14621800 | 1.63101600  | 0.42890400  |
| H     | -5.14509000 | 0.19883500  | 0.24953800  |
| H     | -4.02421900 | 0.24068700  | 1.57697100  |
| C     | -3.72112500 | -2.11418800 | -0.49844000 |
| 50 H  | -3.68549900 | -2.51212300 | 0.52519200  |
| H     | -4.77905700 | -2.06518200 | -0.79251800 |
| H     | -3.23684800 | -2.85837600 | -1.14395200 |
| O     | -1.33331100 | -1.17864200 | -0.17520100 |
| C     | 0.97179800  | -1.29104400 | -0.89627600 |
| 55 C  | 0.68387100  | -2.58211800 | -1.35985100 |
| C     | 2.25471400  | -0.76339700 | -1.11587700 |
| C     | 1.65251200  | -3.32453300 | -2.03824700 |
| H     | -0.30482300 | -2.98795900 | -1.18122400 |
| C     | 3.21966700  | -1.50778500 | -1.79545600 |
| 60 H  | 2.50278400  | 0.22834400  | -0.75471900 |
| C     | 2.92306900  | -2.79107300 | -2.25957700 |
| H     | 1.41095200  | -4.32272400 | -2.39477100 |
| H     | 4.20504100  | -1.08063800 | -1.96415200 |
| H     | 3.67592300  | -3.36880500 | -2.78969300 |
| 65 C  | -0.43313900 | 0.90651000  | -0.83506300 |
| O     | -1.72350500 | 1.21870900  | -0.41598100 |
| H     | -0.43821200 | 0.64895400  | -1.90974100 |
| C     | 0.52975900  | 2.07917900  | -0.68732400 |
| C     | 1.09911400  | 2.62654600  | -1.84655900 |
| 70 C  | 0.82750500  | 2.69618200  | 0.53875700  |
| C     | 1.93470500  | 3.74284200  | -1.79061000 |
| H     | 0.87601300  | 2.17151400  | -2.80835600 |



|     |             |            |             |
|-----|-------------|------------|-------------|
| C   | 1.66192800  | 3.81346000 | 0.60067500  |
| H   | 0.43724200  | 2.29358000 | 1.46852100  |
| C   | 2.21863800  | 4.34379600 | -0.56400800 |
| H   | 2.35838000  | 4.14494100 | -2.70730100 |
| 5 H | 1.88328400  | 4.26412200 | 1.56505600  |
| H   | 2.86737900  | 5.21425900 | -0.51509400 |
| Na  | -2.12939700 | 1.72830100 | 1.65450900  |

**Table S31. Cartesien coordiantes of K-4**

|      |             |             |             |
|------|-------------|-------------|-------------|
| 10 C | 2.77870400  | -1.02242200 | 2.48903500  |
| C    | 2.71537700  | 0.49048000  | 2.74880800  |
| H    | 3.16248700  | -1.57990200 | 3.34679300  |
| H    | 3.37176300  | -1.25629200 | 1.59971600  |
| 15 H | 3.61713000  | 1.01017500  | 2.41715300  |
| H    | 2.53047200  | 0.71348800  | 3.80582500  |
| P    | 0.51464200  | -0.21645800 | 1.67315400  |
| O    | -0.78734200 | -0.03498100 | 2.39597600  |
| O    | 1.41905600  | -1.43808700 | 2.26590700  |
| 20 O | 1.60559600  | 0.97742400  | 1.97072400  |
| C    | 0.37108600  | -0.50207500 | -0.17647500 |
| Si   | -1.86728700 | -2.04503600 | -0.82401400 |
| C    | -2.06813500 | -2.00966600 | -2.72277100 |
| H    | -2.81215200 | -2.75938400 | -3.02251800 |
| 25 H | -2.38965800 | -1.03698000 | -3.11020000 |
| H    | -1.13067500 | -2.28659900 | -3.22209600 |
| C    | -3.59035100 | -2.05773700 | 0.08302700  |
| H    | -4.23654000 | -1.20105400 | -0.15942000 |
| H    | -4.13532700 | -2.95823800 | -0.22108800 |
| 30 H | -3.47861300 | -2.14389600 | 1.17647400  |
| C    | -1.54028700 | -3.94324700 | -0.55252400 |
| H    | -1.40929300 | -4.18854900 | 0.51090200  |
| H    | -2.37328900 | -4.55467000 | -0.92773600 |
| H    | -0.63029700 | -4.27700000 | -1.06773100 |
| 35 O | -0.19894100 | -1.77962000 | -0.20821400 |
| C    | 1.76746500  | -0.50028300 | -0.79857000 |
| C    | 2.35285300  | -1.71656800 | -1.17578400 |
| C    | 2.48519500  | 0.68857900  | -1.00670400 |
| C    | 3.62296100  | -1.74387700 | -1.75549600 |
| 40 H | 1.79456000  | -2.63054900 | -1.01028800 |
| C    | 3.75310000  | 0.65827600  | -1.58864600 |
| H    | 2.05698600  | 1.64104300  | -0.71321400 |
| C    | 4.32796200  | -0.55768400 | -1.96469100 |
| H    | 4.06019700  | -2.69606400 | -2.04564900 |
| 45 H | 4.29134200  | 1.58909900  | -1.74966700 |
| H    | 5.31578300  | -0.57887400 | -2.41799600 |
| C    | -0.66390200 | 0.40345000  | -0.96381400 |
| O    | -1.91774700 | -0.11438200 | -0.65411000 |
| H    | -0.40662300 | 0.17441300  | -2.01458600 |
| 50 C | -0.63749300 | 1.92646900  | -0.85705200 |
| C    | -0.61750900 | 2.66551700  | -2.05007800 |
| C    | -0.72040100 | 2.64474900  | 0.34888100  |
| C    | -0.68039900 | 4.05935200  | -2.04863700 |
| H    | -0.55684800 | 2.13303900  | -2.99592100 |
| 55 C | -0.78111000 | 4.04079700  | 0.35590000  |
| H    | -0.70074500 | 2.12750100  | 1.30250400  |
| C    | -0.76545200 | 4.75561900  | -0.84243100 |
| H    | -0.66235200 | 4.60013200  | -2.99140800 |
| H    | -0.82733500 | 4.56929900  | 1.30536000  |
| 60 H | -0.81079600 | 5.84139000  | -0.83530700 |
| K    | -3.09688200 | 0.58235000  | 1.48341300  |

**Table S32. Cartesien coordiantes of free-TS-5**

|      |             |             |             |
|------|-------------|-------------|-------------|
| 65 C | 0.10051900  | 0.10391000  | 1.05375200  |
| Si   | -3.15863800 | -0.64982500 | 0.81255500  |
| C    | -3.58115000 | 1.18546500  | 0.81035300  |
| H    | -4.66636600 | 1.33694600  | 0.72637200  |
| H    | -3.22285000 | 1.66827300  | 1.72413900  |
| 70 H | -3.08386400 | 1.68704100  | -0.02745900 |
| C    | -4.48909200 | -1.55573300 | -0.19356500 |

|      |             |             |             |
|------|-------------|-------------|-------------|
| H    | -4.48573000 | -1.20807400 | -1.23377600 |
| H    | -4.31301000 | -2.63807100 | -0.20721200 |
| H    | -5.49354400 | -1.37861600 | 0.21377200  |
| C    | -3.16276600 | -1.35137100 | 2.57540200  |
| 5 H  | -2.40198600 | -0.85804100 | 3.18884200  |
| H    | -4.13949200 | -1.18225200 | 3.04845600  |
| H    | -2.97197900 | -2.43205600 | 2.58837000  |
| P    | 0.05193200  | 1.49692300  | -1.40873100 |
| O    | 0.01424900  | 1.04103900  | -2.85531700 |
| 10 O | -1.24813500 | 2.63848500  | -1.20047000 |
| O    | 1.21673400  | 2.76435400  | -1.20543100 |
| C    | -0.78771600 | 3.93649300  | -0.88512700 |
| C    | 0.63185200  | 4.03033200  | -1.45230300 |
| H    | -1.46087000 | 4.68575600  | -1.32831500 |
| 15 H | -0.77260100 | 4.08897500  | 0.20716700  |
| H    | 1.22949800  | 4.80974500  | -0.95976400 |
| H    | 0.59873900  | 4.24603700  | -2.53342200 |
| O    | -0.70615300 | 0.76216500  | 1.72117800  |
| C    | 1.58015300  | 0.29314600  | 1.31284100  |
| 20 C | 1.92402700  | 0.85600100  | 2.55171600  |
| C    | 2.61209900  | -0.07039300 | 0.43440700  |
| C    | 3.25826000  | 1.03695600  | 2.91423300  |
| H    | 1.11863100  | 1.15414400  | 3.21515000  |
| C    | 3.94560800  | 0.11105000  | 0.79625900  |
| 25 H | 2.37378700  | -0.46618400 | -0.54486200 |
| C    | 4.27678100  | 0.66038900  | 2.03782000  |
| H    | 3.50211100  | 1.47516100  | 3.88014100  |
| H    | 4.73040100  | -0.16622100 | 0.09636500  |
| H    | 5.31978300  | 0.80269900  | 2.31342400  |
| 30 C | -0.45643800 | -1.26201300 | 0.52810800  |
| O    | -1.75367200 | -1.09630900 | 0.00250900  |
| H    | -0.52069300 | -1.82349100 | 1.47965300  |
| C    | 0.35882800  | -2.13412200 | -0.41092200 |
| C    | 1.10564900  | -3.19342000 | 0.12184500  |
| 35 C | 0.35899200  | -1.93948500 | -1.80028500 |
| C    | 1.85674600  | -4.03417300 | -0.70134200 |
| H    | 1.10163300  | -3.36081500 | 1.19753400  |
| C    | 1.11021700  | -2.78179500 | -2.62185300 |
| H    | -0.18746800 | -1.10919300 | -2.23735800 |
| 40 C | 1.86038900  | -3.82957200 | -2.08158500 |
| H    | 2.43125600  | -4.84855100 | -0.26450300 |
| H    | 1.11242300  | -2.60628400 | -3.69504100 |
| H    | 2.44222100  | -4.48106500 | -2.73073900 |

45 **Table S33. Cartesien coordiantes of Li-TS-5**

|      |             |             |             |
|------|-------------|-------------|-------------|
| C    | 1.19854800  | -3.34929800 | 1.82340800  |
| C    | 1.90786700  | -2.35002200 | 2.74260500  |
| H    | 0.91945900  | -4.27087900 | 2.34267200  |
| 50 H | 1.81772400  | -3.59935900 | 0.95274200  |
| H    | 2.99154600  | -2.49186700 | 2.76844300  |
| H    | 1.51028700  | -2.39379300 | 3.76430600  |
| P    | 0.13113500  | -1.03807100 | 1.44725000  |
| O    | -0.93894100 | -0.52707000 | 2.44180500  |
| 55 O | 0.00008200  | -2.69754000 | 1.38360900  |
| O    | 1.63593100  | -1.05650400 | 2.17509400  |
| Li   | -2.08839900 | 0.68848100  | 1.79494100  |
| C    | -0.12713900 | -0.31012900 | -0.83742300 |
| Si   | -3.06830500 | -0.10627000 | -0.71942800 |
| 60 C | -3.40887400 | 0.19121100  | -2.55104200 |
| H    | -4.48439400 | 0.10921700  | -2.75008500 |
| H    | -3.10381400 | 1.20309700  | -2.84591600 |
| H    | -2.88043900 | -0.52302700 | -3.18792400 |
| C    | -4.49197200 | 0.82760800  | 0.21030900  |
| 65 H | -4.54351300 | 1.88932300  | -0.05939500 |
| H    | -5.46400600 | 0.37152000  | -0.01775000 |
| H    | -4.41293400 | 0.78126400  | 1.31369300  |
| C    | -3.36079400 | -1.86941200 | -0.07713300 |
| H    | -2.79436500 | -2.06728600 | 0.84129400  |
| 70 H | -4.42315000 | -2.02707600 | 0.14614800  |
| H    | -3.03188000 | -2.61256900 | -0.80856300 |
| O    | -1.11727200 | -1.00005400 | -1.25002300 |

|      |             |             |             |
|------|-------------|-------------|-------------|
| C    | 1.23223800  | -0.62065700 | -1.40528600 |
| C    | 1.29359900  | -1.52511400 | -2.47590100 |
| C    | 2.42072500  | -0.03640200 | -0.93929200 |
| C    | 2.51365100  | -1.82888700 | -3.07882500 |
| 5 H  | 0.37138500  | -1.97926300 | -2.82071900 |
| C    | 3.63799000  | -0.33987500 | -1.54627700 |
| H    | 2.40222600  | 0.63418600  | -0.08830400 |
| C    | 3.68941000  | -1.23402400 | -2.61872300 |
| H    | 2.54498300  | -2.52979100 | -3.90904800 |
| 10 H | 4.55055300  | 0.11857400  | -1.17458900 |
| H    | 4.64137600  | -1.46859000 | -3.08807500 |
| C    | -0.59938000 | 1.15771700  | -0.63216800 |
| O    | -1.89541000 | 1.04703800  | -0.03316000 |
| H    | -0.74520500 | 1.48886700  | -1.67218400 |
| 15 C | 0.25200300  | 2.22667800  | 0.02452700  |
| C    | 0.82786300  | 3.19900200  | -0.80783900 |
| C    | 0.48553700  | 2.32227400  | 1.40607300  |
| C    | 1.61892500  | 4.22316800  | -0.28870500 |
| H    | 0.65294300  | 3.15148200  | -1.87990500 |
| 20 C | 1.27118900  | 3.35142400  | 1.92932100  |
| H    | 0.08979900  | 1.57995300  | 2.09072200  |
| C    | 1.84231200  | 4.30477100  | 1.08618800  |
| H    | 2.05307800  | 4.96037800  | -0.95873500 |
| H    | 1.44174200  | 3.39811000  | 3.00152600  |
| 25 H | 2.45374300  | 5.10379100  | 1.49655800  |

**Table S34. Cartesien coordiantes of Na-TS-5**

|       |             |             |             |
|-------|-------------|-------------|-------------|
| C     | 2.02423800  | -2.95300300 | 1.86340800  |
| 30 C  | 2.49363400  | -1.80398100 | 2.76041200  |
| H     | 1.99352600  | -3.91104400 | 2.39202300  |
| H     | 2.66651600  | -3.05212000 | 0.97844900  |
| H     | 3.58158600  | -1.69123100 | 2.76992200  |
| H     | 2.13362400  | -1.93098800 | 3.78983700  |
| 35 P  | 0.42868500  | -0.96121200 | 1.48640400  |
| O     | -0.70591000 | -0.69095800 | 2.49404300  |
| O     | 0.69519400  | -2.61532500 | 1.45620600  |
| O     | 1.91917700  | -0.61991400 | 2.18800700  |
| C     | 0.08043300  | -0.38398000 | -0.91422600 |
| 40 Si | -2.85912500 | -0.81162200 | -0.95080100 |
| C     | -3.08318600 | -0.83203300 | -2.82534400 |
| H     | -4.08844300 | -1.18783000 | -3.08245600 |
| H     | -2.98682000 | 0.18071500  | -3.23728200 |
| H     | -2.34735200 | -1.47063700 | -3.32025300 |
| 45 C  | -4.55994900 | -0.14138700 | -0.29709300 |
| H     | -4.79192100 | 0.85775800  | -0.68614800 |
| H     | -5.37267100 | -0.81532400 | -0.59852000 |
| H     | -4.64099400 | -0.08286700 | 0.80529800  |
| C     | -2.79257300 | -2.49102500 | -0.06964900 |
| 50 H  | -2.26158600 | -2.42539800 | 0.88879000  |
| H     | -3.80352100 | -2.86812600 | 0.13001200  |
| H     | -2.24723600 | -3.22670800 | -0.66678800 |
| O     | -0.68913000 | -1.31063100 | -1.30918400 |
| C     | 1.51109200  | -0.39940200 | -1.37876700 |
| 55 C  | 1.86341600  | -1.35065600 | -2.34841700 |
| C     | 2.48902600  | 0.49722400  | -0.91993800 |
| C     | 3.15968500  | -1.39659200 | -2.85970600 |
| H     | 1.10331600  | -2.04526800 | -2.68827000 |
| C     | 3.78265400  | 0.45143600  | -1.43601500 |
| 60 H  | 2.25129900  | 1.21176600  | -0.14102000 |
| C     | 4.12264300  | -0.49231800 | -2.40862200 |
| H     | 3.41672600  | -2.13761400 | -3.61235100 |
| H     | 4.53018800  | 1.15026400  | -1.06996400 |
| H     | 5.13351100  | -0.52527100 | -2.80702900 |
| 65 C  | -0.72208900 | 0.94553200  | -0.82659800 |
| O     | -2.01370000 | 0.59574500  | -0.32897600 |
| H     | -0.83232600 | 1.19368800  | -1.89532500 |
| C     | -0.20419900 | 2.21019300  | -0.16523900 |
| C     | 0.07270600  | 3.31148300  | -0.98921700 |
| 70 C  | -0.02301800 | 2.36536200  | 1.21977100  |
| C     | 0.52204200  | 4.52156500  | -0.46010300 |
| H     | -0.06695400 | 3.21889400  | -2.06354600 |

|     |             |            |             |
|-----|-------------|------------|-------------|
| C   | 0.42187100  | 3.57729200 | 1.75266500  |
| H   | -0.17950800 | 1.53079000 | 1.89517100  |
| C   | 0.69593900  | 4.66072500 | 0.91709200  |
| H   | 0.73039800  | 5.35542900 | -1.12514400 |
| 5 H | 0.56737100  | 3.66513000 | 2.82627100  |
| H   | 1.04391700  | 5.60160900 | 1.33468700  |
| Na  | -2.42785400 | 0.41230300 | 1.86468600  |

**Table S35. Cartesien coordiantes of K-TS-5**

|      |             |             |             |
|------|-------------|-------------|-------------|
| 10 C | 2.33377800  | -2.72440300 | 1.99589200  |
| C    | 2.64746000  | -1.53008400 | 2.90146300  |
| H    | 2.37193000  | -3.67763400 | 2.53375100  |
| H    | 3.02841800  | -2.76785000 | 1.14578100  |
| 15 H | 3.71926300  | -1.32008200 | 2.96902300  |
| H    | 2.24661800  | -1.68477100 | 3.91268500  |
| P    | 0.57737300  | -0.89067800 | 1.51295900  |
| O    | -0.62512300 | -0.72207200 | 2.45656200  |
| O    | 1.00203300  | -2.51917700 | 1.52242000  |
| 20 O | 2.00028700  | -0.40981600 | 2.28627100  |
| C    | 0.32571700  | -0.40816700 | -0.96840400 |
| Si   | -2.56953600 | -1.15243000 | -1.29271300 |
| C    | -2.47524200 | -1.29492800 | -3.17502100 |
| H    | -3.39001100 | -1.75776800 | -3.56561100 |
| 25 H | -2.39930600 | -0.30112500 | -3.63520800 |
| H    | -1.61507500 | -1.88400000 | -3.50135700 |
| C    | -4.41939800 | -0.66457200 | -0.99806500 |
| H    | -4.67006100 | 0.29546200  | -1.46673400 |
| H    | -5.07809800 | -1.42700200 | -1.43544800 |
| 30 H | -4.72431200 | -0.59622700 | 0.06051000  |
| C    | -2.42374400 | -2.75874700 | -0.29372200 |
| H    | -1.94509300 | -2.58799000 | 0.67901600  |
| H    | -3.40666000 | -3.21576400 | -0.12111100 |
| H    | -1.78521100 | -3.47859400 | -0.81371500 |
| 35 O | -0.26716500 | -1.44635400 | -1.36869100 |
| C    | 1.78446400  | -0.24234000 | -1.29965700 |
| C    | 2.35824500  | -1.19186000 | -2.15925800 |
| C    | 2.58235800  | 0.81033900  | -0.82476200 |
| C    | 3.69388700  | -1.08699000 | -2.54481300 |
| 40 H | 1.73647400  | -2.00667900 | -2.51331800 |
| C    | 3.91569400  | 0.91573100  | -1.21572700 |
| H    | 2.17450600  | 1.53226300  | -0.12773700 |
| C    | 4.47668100  | -0.02977800 | -2.07788600 |
| H    | 4.12249100  | -1.83024300 | -3.21247600 |
| 45 H | 4.52145300  | 1.73452300  | -0.83630400 |
| H    | 5.51801200  | 0.05509000  | -2.37820600 |
| C    | -0.64961500 | 0.80683600  | -0.99841700 |
| O    | -1.93590800 | 0.32009500  | -0.61977700 |
| H    | -0.67416000 | 1.01959600  | -2.08105600 |
| 50 C | -0.36470800 | 2.14274100  | -0.33253700 |
| C    | -0.19997400 | 3.26386500  | -1.15962000 |
| C    | -0.29682500 | 2.33804500  | 1.05800600  |
| C    | 0.03191400  | 4.53355100  | -0.62922200 |
| H    | -0.25260300 | 3.13910800  | -2.23859300 |
| 55 C | -0.06717300 | 3.60843200  | 1.59133500  |
| H    | -0.37318500 | 1.49409800  | 1.73531300  |
| C    | 0.09643900  | 4.71214900  | 0.75257000  |
| H    | 0.15945500  | 5.38111300  | -1.29744600 |
| H    | -0.00030500 | 3.72876800  | 2.66992600  |
| 60 H | 0.27801700  | 5.69823600  | 1.17163500  |
| K    | -2.82854600 | 0.26164900  | 1.88437200  |
